# Supplementary material for: NuChart: An R Package to Study Gene Spatial Neighbourhoods with Multi-Omics Annotations
Source: PubMed Central journal article supplement (PMC3777921; doi:10.1371/journal.pone.0075146), 2013-09-19
Supplement: pone.0075146.s001.pdf [file pone.0075146.s001.pdf]

```
> model_base <- ergm(n1 ~ edges+degree(1))
```

```
Iteration 1 of at most 20:  
Convergence test P-value: 2.3e-27  
The log-likelihood improved by 0.5436  
Iteration 2 of at most 20:  
Convergence test P-value: 3.3e-19  
The log-likelihood improved by 0.3567  
Iteration 3 of at most 20:  
Convergence test P-value: 2.9e-15  
The log-likelihood improved by 0.3184  
Iteration 4 of at most 20:  
Convergence test P-value: 3e-42  
The log-likelihood improved by 0.2939  
Iteration 5 of at most 20:  
Convergence test P-value: 3.4e-21  
The log-likelihood improved by 0.1283  
Iteration 6 of at most 20:  
Convergence test P-value: 4.1e-14  
The log-likelihood improved by 0.05055  
Iteration 7 of at most 20:  
Convergence test P-value: 9.1e-05  
The log-likelihood improved by 0.01616  
Iteration 8 of at most 20:  
Convergence test P-value: 2.2e-01  
The log-likelihood improved by 0.003225  
Iteration 9 of at most 20:  
Convergence test P-value: 4.4e-01  
The log-likelihood improved by 0.001786  
Iteration 10 of at most 20:  
Convergence test P-value: 8.5e-01  
Convergence detected. Stopping.  
The log-likelihood improved by 0.0005741
```

```
> summary(model_base)
```

```
=====  
Summary of model fit  
=====
```

```
Formula: n1 ~ edges + degree(1)
```

```
Iterations: 20
```

**Monte Carlo MLE Results:**

|         | Estimate | Std. Error | MCMC % | p-value    |
|---------|----------|------------|--------|------------|
| edges   | -3.21882 | 0.20173    | 20     | <1e-04 *** |
| degree1 | 2.63232  | 0.37375    | 20     | <1e-04 *** |

```
---
```

```
Signif. codes: 0 "****" 0.001 "***" 0.01 "**" 0.05 "." 0.1 " " 1
```

```
Null Deviance: 7714.7 on 5565 degrees of freedom  
Residual Deviance: 955.3 on 5562 degrees of freedom
```

```
AIC: 961.3 BIC: 981.2 (Smaller is better.)
```

```
> gof(model_base)
```

Goodness-of-fit for degree

|    | obs | min | mean  | max | MC | p-value |
|----|-----|-----|-------|-----|----|---------|
| 0  | 0   | 0   | 1.49  | 5   |    | 0.40    |
| 1  | 67  | 49  | 67.11 | 81  |    | 1.00    |
| 2  | 12  | 3   | 7.77  | 16  |    | 0.08    |
| 3  | 17  | 2   | 8.39  | 15  |    | 0.00    |
| 4  | 2   | 2   | 7.78  | 19  |    | 0.02    |
| 5  | 1   | 0   | 5.22  | 13  |    | 0.04    |
| 6  | 2   | 0   | 3.65  | 11  |    | 0.70    |
| 7  | 1   | 0   | 1.61  | 6   |    | 1.00    |
| 8  | 0   | 0   | 0.89  | 4   |    | 0.88    |
| 9  | 0   | 0   | 0.49  | 2   |    | 1.00    |
| 10 | 0   | 0   | 0.30  | 2   |    | 1.00    |
| 11 | 0   | 0   | 0.13  | 2   |    | 1.00    |
| 12 | 0   | 0   | 0.08  | 1   |    | 1.00    |
| 13 | 1   | 0   | 0.02  | 1   |    | 0.04    |
| 14 | 1   | 0   | 0.04  | 1   |    | 0.08    |
| 15 | 1   | 0   | 0.01  | 1   |    | 0.02    |
| 16 | 0   | 0   | 0.01  | 1   |    | 1.00    |
| 17 | 0   | 0   | 0.02  | 1   |    | 1.00    |
| 18 | 0   | 0   | 0.03  | 1   |    | 1.00    |
| 19 | 0   | 0   | 0.04  | 1   |    | 1.00    |
| 20 | 0   | 0   | 0.09  | 1   |    | 1.00    |
| 21 | 0   | 0   | 0.03  | 1   |    | 1.00    |
| 22 | 0   | 0   | 0.11  | 1   |    | 1.00    |
| 23 | 0   | 0   | 0.06  | 1   |    | 1.00    |
| 24 | 1   | 0   | 0.11  | 1   |    | 0.22    |
| 25 | 0   | 0   | 0.08  | 1   |    | 1.00    |
| 26 | 0   | 0   | 0.08  | 1   |    | 1.00    |
| 27 | 0   | 0   | 0.05  | 1   |    | 1.00    |
| 28 | 0   | 0   | 0.08  | 1   |    | 1.00    |
| 29 | 0   | 0   | 0.05  | 1   |    | 1.00    |
| 30 | 0   | 0   | 0.04  | 1   |    | 1.00    |
| 31 | 0   | 0   | 0.05  | 1   |    | 1.00    |
| 32 | 0   | 0   | 0.02  | 1   |    | 1.00    |
| 33 | 0   | 0   | 0.02  | 1   |    | 1.00    |
| 34 | 0   | 0   | 0.03  | 1   |    | 1.00    |
| 35 | 0   | 0   | 0.01  | 1   |    | 1.00    |
| 37 | 0   | 0   | 0.01  | 1   |    | 1.00    |

Goodness-of-fit for edgewise shared partner

|      | obs | min | mean  | max | MC | p-value |
|------|-----|-----|-------|-----|----|---------|
| esp0 | 120 | 80  | 96.95 | 127 |    | 0.02    |
| esp1 | 0   | 6   | 18.19 | 39  |    | 0.00    |
| esp2 | 0   | 0   | 4.40  | 14  |    | 0.16    |
| esp3 | 0   | 0   | 1.00  | 7   |    | 0.90    |
| esp4 | 0   | 0   | 0.25  | 2   |    | 1.00    |
| esp5 | 0   | 0   | 0.03  | 1   |    | 1.00    |
| esp6 | 0   | 0   | 0.01  | 1   |    | 1.00    |
| esp9 | 0   | 0   | 0.01  | 1   |    | 1.00    |

Goodness-of-fit for minimum geodesic distance

|  | obs | min | mean | max | MC | p-value |
|--|-----|-----|------|-----|----|---------|
|--|-----|-----|------|-----|----|---------|

```

1    120  91  120.84  156    0.98
2    655 266  549.42  839    0.42
3    809 437 1020.72 1664    0.42
4   1414 469 1013.03 1436    0.04
5    837 214  591.72 1005    0.18
6    741  18  221.17  554    0.00
7    380  0   58.46  237    0.00
8     74  0   11.93  123    0.06
9     30  0    2.78   64    0.06
10     0  0    0.77   26    1.00
11     0  0    0.09    5    1.00
12     0  0    0.01    1    1.00
Inf  505 905 1974.06 3738    0.00

```

```

> mcmc.diagnostics(model_base)
Sample statistics summary:

```

```

Iterations = 10000:1009900
Thinning interval = 100
Number of chains = 1
Sample size per chain = 10000

```

1. Empirical mean and standard deviation for each variable,  
plus standard error of the mean:

|         | Mean    | SD    | Naive SE | Time-series SE |
|---------|---------|-------|----------|----------------|
| edges   | -0.1439 | 14.97 | 0.1497   | 1.1506         |
| degree1 | 0.1558  | 6.67  | 0.0667   | 0.4535         |

2. Quantiles for each variable:

|         | 2.5% | 25% | 50% | 75% | 97.5% |
|---------|------|-----|-----|-----|-------|
| edges   | -26  | -11 | -1  | 10  | 31    |
| degree1 | -13  | -4  | 0   | 5   | 12    |

**Are sample statistics significantly different from observed?**

|            | edges      | degree1   | Overall (Chi <sup>2</sup> ) |
|------------|------------|-----------|-----------------------------|
| diff.      | -0.1439000 | 0.1558000 | NA                          |
| test stat. | -0.1250666 | 0.3435344 | 0.8063061                   |
| P-val.     | 0.9004709  | 0.7311965 | 0.8479581                   |

Sample statistics cross-correlations:

|         | edges      | degree1    | nodecov.features |
|---------|------------|------------|------------------|
| edges   | 1.0000000  | -0.8767134 | 0.6755583        |
| degree1 | -0.8767134 | 1.0000000  | -0.4611390       |

Sample statistics auto-correlation:

Chain 1

|         | edges     | degree1   |
|---------|-----------|-----------|
| Lag 0   | 1.0000000 | 1.0000000 |
| Lag 100 | 0.9516084 | 0.9008448 |
| Lag 200 | 0.9119373 | 0.8374290 |
| Lag 300 | 0.8752097 | 0.7898382 |
| Lag 400 | 0.8422160 | 0.7479431 |
| Lag 500 | 0.8092260 | 0.7123876 |

Sample statistics burn-in diagnostic (Geweke):

Chain 1

Fraction in 1st window = 0.1  
Fraction in 2nd window = 0.5

|         |         |
|---------|---------|
| edges   | degree1 |
| -0.8652 | 0.8777  |

P-values (lower = worse):

|           |           |
|-----------|-----------|
| edges     | degree1   |
| 0.3869519 | 0.3801096 |

### Sample statistics

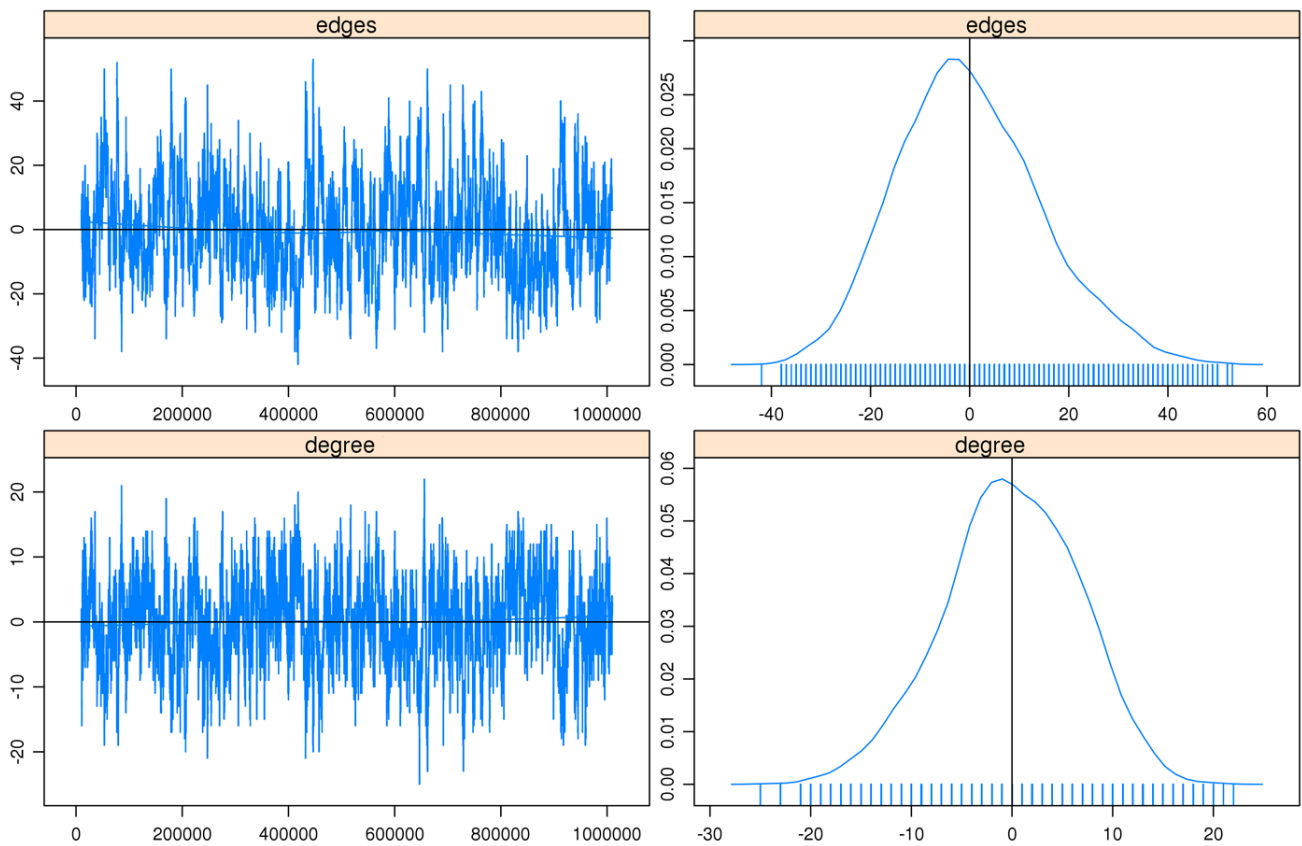

Supplementary Figure 1. Simulation details (left) and related statistics (right) of the stochastic analysis about the two components estimator for the graph describing the HOXB cluster of genes according to the Lieberman-Aiden et al. Hi-C experiment.

```
> model_ctcf <- ergm(n1 ~ edges+degree(1)+nodecov("ctcf"))
```

```
Iteration 1 of at most 20:  
Convergence test P-value: 1.1e-46  
The log-likelihood improved by 0.7188  
Iteration 2 of at most 20:  
Convergence test P-value: 3.7e-45  
The log-likelihood improved by 0.4368  
Iteration 3 of at most 20:  
Convergence test P-value: 5.9e-25  
The log-likelihood improved by 0.2327  
Iteration 4 of at most 20:  
Convergence test P-value: 1.3e-29  
The log-likelihood improved by 0.1199  
Iteration 5 of at most 20:  
Convergence test P-value: 1.6e-11  
The log-likelihood improved by 0.04484  
Iteration 6 of at most 20:  
Convergence test P-value: 2.8e-04  
The log-likelihood improved by 0.01505  
Iteration 7 of at most 20:  
Convergence test P-value: 4.3e-04  
The log-likelihood improved by 0.01176  
Iteration 8 of at most 20:  
Convergence test P-value: 2.6e-01  
The log-likelihood improved by 0.0027  
Iteration 9 of at most 20:  
Convergence test P-value: 3e-01  
The log-likelihood improved by 0.002686  
Iteration 10 of at most 20:  
Convergence test P-value: 7.6e-01  
Convergence detected. Stopping.  
The log-likelihood improved by 0.0007933
```

```
> summary(model_ctcf)
```

```
=====  
Summary of model fit  
=====
```

```
Formula: n1 ~ edges + degree(1) + nodecov("ctcf")
```

```
Iterations: 20
```

**Monte Carlo MLE Results:**

|              | Estimate | Std. Error | MCMC % | p-value |     |
|--------------|----------|------------|--------|---------|-----|
| edges        | -3.22486 | 0.20126    | 17     | <1e-04  | *** |
| degree1      | 2.62902  | 0.36735    | 16     | <1e-04  | *** |
| nodecov.ctcf | 0.52386  | 0.04158    | 6      | <1e-04  | *** |

```
---  
Signif. codes: 0 "****" 0.001 "***" 0.01 "**" 0.05 "." 0.1 " " 1
```

```
Null Deviance: 7714.7 on 5565 degrees of freedom  
Residual Deviance: 954.5 on 5562 degrees of freedom
```

```
AIC: 960.5 BIC: 980.4 (Smaller is better.)
```

```
> gof(model_ctcf)
```

Goodness-of-fit for degree

|    | obs | min | mean  | max | MC | p-value |
|----|-----|-----|-------|-----|----|---------|
| 0  | 0   | 0   | 1.39  | 5   |    | 0.44    |
| 1  | 67  | 55  | 68.07 | 87  |    | 0.98    |
| 2  | 12  | 2   | 7.85  | 15  |    | 0.18    |
| 3  | 17  | 2   | 8.71  | 16  |    | 0.00    |
| 4  | 2   | 1   | 7.65  | 16  |    | 0.04    |
| 5  | 1   | 0   | 4.91  | 11  |    | 0.10    |
| 6  | 2   | 0   | 3.05  | 9   |    | 0.92    |
| 7  | 1   | 0   | 1.55  | 7   |    | 1.00    |
| 8  | 0   | 0   | 0.84  | 5   |    | 0.80    |
| 9  | 0   | 0   | 0.41  | 3   |    | 1.00    |
| 10 | 0   | 0   | 0.26  | 2   |    | 1.00    |
| 11 | 0   | 0   | 0.12  | 2   |    | 1.00    |
| 12 | 0   | 0   | 0.10  | 1   |    | 1.00    |
| 13 | 1   | 0   | 0.02  | 1   |    | 0.04    |
| 14 | 1   | 0   | 0.06  | 1   |    | 0.12    |
| 15 | 1   | 0   | 0.02  | 1   |    | 0.04    |
| 16 | 0   | 0   | 0.01  | 1   |    | 1.00    |
| 17 | 0   | 0   | 0.07  | 1   |    | 1.00    |
| 18 | 0   | 0   | 0.03  | 1   |    | 1.00    |
| 19 | 0   | 0   | 0.02  | 1   |    | 1.00    |
| 20 | 0   | 0   | 0.03  | 1   |    | 1.00    |
| 21 | 0   | 0   | 0.09  | 1   |    | 1.00    |
| 22 | 0   | 0   | 0.08  | 1   |    | 1.00    |
| 23 | 0   | 0   | 0.07  | 1   |    | 1.00    |
| 24 | 1   | 0   | 0.08  | 1   |    | 0.16    |
| 25 | 0   | 0   | 0.11  | 1   |    | 1.00    |
| 26 | 0   | 0   | 0.09  | 1   |    | 1.00    |
| 27 | 0   | 0   | 0.05  | 1   |    | 1.00    |
| 28 | 0   | 0   | 0.07  | 1   |    | 1.00    |
| 29 | 0   | 0   | 0.09  | 1   |    | 1.00    |
| 30 | 0   | 0   | 0.04  | 1   |    | 1.00    |
| 31 | 0   | 0   | 0.02  | 1   |    | 1.00    |
| 32 | 0   | 0   | 0.02  | 1   |    | 1.00    |
| 33 | 0   | 0   | 0.01  | 1   |    | 1.00    |
| 38 | 0   | 0   | 0.01  | 1   |    | 1.00    |

Goodness-of-fit for edgewise shared partner

|      | obs | min | mean  | max | MC | p-value |
|------|-----|-----|-------|-----|----|---------|
| esp0 | 120 | 76  | 97.88 | 120 |    | 0.02    |
| esp1 | 0   | 0   | 15.54 | 36  |    | 0.02    |
| esp2 | 0   | 0   | 3.29  | 13  |    | 0.40    |
| esp3 | 0   | 0   | 0.83  | 5   |    | 1.00    |
| esp4 | 0   | 0   | 0.11  | 3   |    | 1.00    |
| esp5 | 0   | 0   | 0.03  | 1   |    | 1.00    |

Goodness-of-fit for minimum geodesic distance

|   | obs | min | mean   | max | MC | p-value |
|---|-----|-----|--------|-----|----|---------|
| 1 | 120 | 86  | 117.68 | 144 |    | 0.82    |
| 2 | 655 | 221 | 519.89 | 924 |    | 0.20    |

```

3      809 301  954.78 1496      0.60
4     1414 238  970.08 1471      0.02
5      837  78  582.70  994      0.16
6      741  30  231.17  616      0.00
7      380   0   72.54  281      0.00
8       74   0   20.04  256      0.18
9       30   0    6.80  203      0.12
10      0   0    2.63  130      1.00
11      0   0    0.76   52      1.00
12      0   0    0.16   16      1.00
Inf    505 511 2085.77 4194      0.00

```

```

> mcmc.diagnostics(model_ctcf)
Sample statistics summary:

```

```

Iterations = 10000:1009900
Thinning interval = 100
Number of chains = 1
Sample size per chain = 10000

```

1. Empirical mean and standard deviation for each variable,  
plus standard error of the mean:

|              | Mean    | SD     | Naive SE | Time-series SE |
|--------------|---------|--------|----------|----------------|
| edges        | -0.8918 | 13.957 | 0.13957  | 0.9713         |
| degree1      | 0.2751  | 6.575  | 0.06575  | 0.4017         |
| nodecov.ctcf | -2.4106 | 32.056 | 0.32056  | 2.4000         |

2. Quantiles for each variable:

|              | 2.5% | 25% | 50% | 75% | 97.5% |
|--------------|------|-----|-----|-----|-------|
| edges        | -26  | -11 | -2  | 8   | 29.00 |
| degree1      | -13  | -4  | 1   | 5   | 12.02 |
| nodecov.ctcf | -66  | -24 | -2  | 20  | 58.00 |

**Are sample statistics significantly different from observed?**

|            | edges      | degree1   | nodecov.ctcf | Overall (Chi <sup>2</sup> ) |
|------------|------------|-----------|--------------|-----------------------------|
| diff.      | -0.8918000 | 0.2751000 | -1.4106000   | NA                          |
| test stat. | -0.9181081 | 0.6848680 | -1.0044315   | 1.1555172                   |
| P-val.     | 0.3585622  | 0.4934272 | 0.3151707    | 0.7636917                   |

Sample statistics cross-correlations:

|              | edges      | degree1    | nodecov.ctcf |
|--------------|------------|------------|--------------|
| edges        | 1.0000000  | -0.8753849 | 0.6168059    |
| degree1      | -0.8753849 | 1.0000000  | -0.4054477   |
| nodecov.ctcf | 0.6168059  | -0.4054477 | 1.0000000    |

Sample statistics auto-correlation:

Chain 1

|         | edges     | degree1   | nodecov.ctcf |
|---------|-----------|-----------|--------------|
| Lag 0   | 1.0000000 | 1.0000000 | 1.0000000    |
| Lag 100 | 0.9449862 | 0.8970551 | 0.9613638    |
| Lag 200 | 0.8985582 | 0.8262543 | 0.9260649    |
| Lag 300 | 0.8582403 | 0.7722118 | 0.8939116    |
| Lag 400 | 0.8207605 | 0.7273405 | 0.8629792    |
| Lag 500 | 0.7861635 | 0.6889831 | 0.8338639    |

Sample statistics burn-in diagnostic (Geweke):

Chain 1

Fraction in 1st window = 0.1  
Fraction in 2nd window = 0.5

| edges   | degree1 | nodecov.ctcf |
|---------|---------|--------------|
| -0.3159 | -0.1597 | -1.0137      |

P-values (lower = worse):

| edges     | degree1   | nodecov.ctcf |
|-----------|-----------|--------------|
| 0.7520804 | 0.8731382 | 0.3107134    |

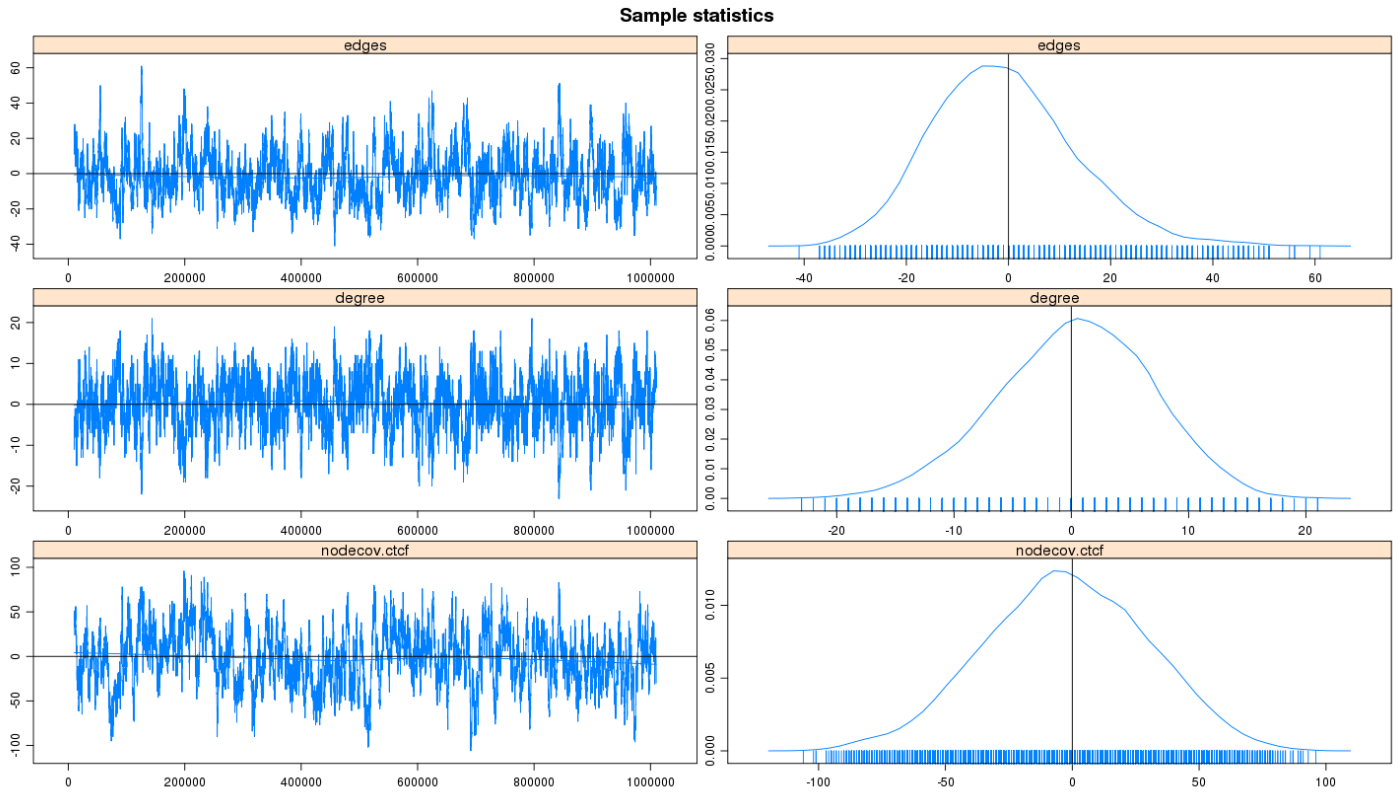

Supplementary Figure 2. Simulation details (left) and related statistics (right) of the stochastic analysis about the three components estimator (edges, degree, and nodecov.ctcf) for the graph describing the HOXB cluster of genes according to the Lieberman-Aiden et al. Hi-C experiment.



```
> model_rss <- ergm(n1 ~ edges+degree(1)+nodecov("rss"))
```

```
Iteration 1 of at most 20:  
Convergence test P-value: 4.2e-213  
The log-likelihood improved by 1.639  
Iteration 2 of at most 20:  
Convergence test P-value: 2.7e-27  
The log-likelihood improved by 0.5103  
Iteration 3 of at most 20:  
Convergence test P-value: 1.1e-34  
The log-likelihood improved by 0.5345  
Iteration 4 of at most 20:  
Convergence test P-value: 4.8e-33  
The log-likelihood improved by 0.3403  
Iteration 5 of at most 20:  
Convergence test P-value: 1.1e-40  
The log-likelihood improved by 0.2575  
Iteration 6 of at most 20:  
Convergence test P-value: 7.9e-28  
The log-likelihood improved by 0.1187  
Iteration 7 of at most 20:  
Convergence test P-value: 8.4e-14  
The log-likelihood improved by 0.04614  
Iteration 8 of at most 20:  
Convergence test P-value: 7.3e-02  
The log-likelihood improved by 0.004191  
Iteration 9 of at most 20:  
Convergence test P-value: 4.4e-01  
The log-likelihood improved by 0.001731  
Iteration 10 of at most 20:  
Convergence test P-value: 3.4e-01  
The log-likelihood improved by 0.00267  
Iteration 11 of at most 20:  
Convergence test P-value: 3.7e-01  
The log-likelihood improved by 0.001355  
Iteration 12 of at most 20:  
Convergence test P-value: 8.3e-03  
The log-likelihood improved by 0.004198  
Iteration 13 of at most 20:  
Convergence test P-value: 2.9e-01  
The log-likelihood improved by 0.0019  
Iteration 14 of at most 20:  
Convergence test P-value: 3.4e-01  
The log-likelihood improved by 0.001825  
Iteration 15 of at most 20:  
Convergence test P-value: 9.9e-02  
The log-likelihood improved by 0.004545  
Iteration 16 of at most 20:  
Convergence test P-value: 9.7e-01  
Convergence detected. Stopping.  
The log-likelihood improved by 0.0001182
```

```
> summary(model_rss)
```

```
=====  
Summary of model fit  
=====
```

Formula: nl ~ edges + degree(1) + nodecov("rss")

Iterations: 20

**Monte Carlo MLE Results:**

|             | Estimate | Std. Error | MCMC % | p-value    |
|-------------|----------|------------|--------|------------|
| edges       | -3.36306 | 0.22717    | 28     | <1e-04 *** |
| degree1     | 2.60012  | 0.38793    | 25     | <1e-04 *** |
| nodecov.rss | 0.39780  | 0.03176    | 12     | <1e-04 *** |

---

Signif. codes: 0 "\*\*\*\*" 0.001 "\*\*\*" 0.01 "\*\*" 0.05 "." 0.1 " " 1

Null Deviance: 7714.7 on 5565 degrees of freedom  
Residual Deviance: 954.1 on 5562 degrees of freedom

AIC: 960.1 BIC: 980 (Smaller is better.)

> gof(model\_rss)

Goodness-of-fit for degree

|    | obs | min | mean  | max | MC | p-value |
|----|-----|-----|-------|-----|----|---------|
| 0  | 0   | 0   | 1.43  | 5   |    | 0.52    |
| 1  | 67  | 49  | 67.01 | 78  |    | 0.92    |
| 2  | 12  | 3   | 8.37  | 14  |    | 0.38    |
| 3  | 17  | 3   | 8.94  | 19  |    | 0.06    |
| 4  | 2   | 2   | 7.77  | 15  |    | 0.04    |
| 5  | 1   | 1   | 4.83  | 12  |    | 0.08    |
| 6  | 2   | 0   | 2.78  | 7   |    | 0.92    |
| 7  | 1   | 0   | 1.80  | 6   |    | 0.96    |
| 8  | 0   | 0   | 0.93  | 4   |    | 0.82    |
| 9  | 0   | 0   | 0.50  | 2   |    | 1.00    |
| 10 | 0   | 0   | 0.25  | 2   |    | 1.00    |
| 11 | 0   | 0   | 0.20  | 2   |    | 1.00    |
| 12 | 0   | 0   | 0.07  | 1   |    | 1.00    |
| 13 | 1   | 0   | 0.06  | 1   |    | 0.12    |
| 14 | 1   | 0   | 0.03  | 1   |    | 0.06    |
| 15 | 1   | 0   | 0.01  | 1   |    | 0.02    |
| 16 | 0   | 0   | 0.06  | 1   |    | 1.00    |
| 17 | 0   | 0   | 0.02  | 1   |    | 1.00    |
| 18 | 0   | 0   | 0.06  | 1   |    | 1.00    |
| 19 | 0   | 0   | 0.05  | 1   |    | 1.00    |
| 20 | 0   | 0   | 0.07  | 1   |    | 1.00    |
| 21 | 0   | 0   | 0.04  | 1   |    | 1.00    |
| 22 | 0   | 0   | 0.10  | 1   |    | 1.00    |
| 23 | 0   | 0   | 0.14  | 1   |    | 1.00    |
| 24 | 1   | 0   | 0.10  | 1   |    | 0.20    |
| 25 | 0   | 0   | 0.07  | 1   |    | 1.00    |
| 26 | 0   | 0   | 0.09  | 1   |    | 1.00    |
| 27 | 0   | 0   | 0.05  | 1   |    | 1.00    |
| 28 | 0   | 0   | 0.03  | 1   |    | 1.00    |
| 29 | 0   | 0   | 0.04  | 1   |    | 1.00    |
| 30 | 0   | 0   | 0.03  | 1   |    | 1.00    |
| 31 | 0   | 0   | 0.03  | 1   |    | 1.00    |
| 32 | 0   | 0   | 0.01  | 1   |    | 1.00    |
| 34 | 0   | 0   | 0.01  | 1   |    | 1.00    |
| 38 | 0   | 0   | 0.01  | 1   |    | 1.00    |
| 39 | 0   | 0   | 0.01  | 1   |    | 1.00    |

Goodness-of-fit for edgewise shared partner

|      | obs | min | mean  | max | MC | p-value |
|------|-----|-----|-------|-----|----|---------|
| esp0 | 120 | 81  | 97.59 | 130 |    | 0.06    |
| esp1 | 0   | 0   | 16.67 | 40  |    | 0.02    |
| esp2 | 0   | 0   | 3.74  | 12  |    | 0.22    |
| esp3 | 0   | 0   | 0.78  | 4   |    | 1.00    |
| esp4 | 0   | 0   | 0.18  | 3   |    | 1.00    |
| esp5 | 0   | 0   | 0.03  | 1   |    | 1.00    |
| esp6 | 0   | 0   | 0.01  | 1   |    | 1.00    |

Goodness-of-fit for minimum geodesic distance

|     | obs  | min | mean    | max  | MC | p-value |
|-----|------|-----|---------|------|----|---------|
| 1   | 120  | 97  | 119.00  | 160  |    | 0.90    |
| 2   | 655  | 305 | 512.67  | 941  |    | 0.28    |
| 3   | 809  | 484 | 951.40  | 1558 |    | 0.66    |
| 4   | 1414 | 439 | 972.45  | 1603 |    | 0.10    |
| 5   | 837  | 234 | 594.14  | 948  |    | 0.18    |
| 6   | 741  | 49  | 237.53  | 532  |    | 0.00    |
| 7   | 380  | 2   | 70.43   | 270  |    | 0.00    |
| 8   | 74   | 0   | 16.48   | 114  |    | 0.08    |
| 9   | 30   | 0   | 3.41    | 65   |    | 0.04    |
| 10  | 0    | 0   | 0.65    | 32   |    | 1.00    |
| 11  | 0    | 0   | 0.21    | 15   |    | 1.00    |
| Inf | 505  | 412 | 2086.63 | 3609 |    | 0.02    |

```
> mcmc.diagnostics(model_rss)
Sample statistics summary:
```

```
Iterations = 10000:1009900
Thinning interval = 100
Number of chains = 1
Sample size per chain = 10000
```

1. Empirical mean and standard deviation for each variable,  
plus standard error of the mean:

|             | Mean    | SD     | Naive SE | Time-series SE |
|-------------|---------|--------|----------|----------------|
| edges       | 0.0505  | 14.077 | 0.14077  | 0.9633         |
| degree1     | -0.1124 | 6.372  | 0.06372  | 0.3876         |
| nodecov.rss | 0.0745  | 47.443 | 0.47443  | 3.5640         |

2. Quantiles for each variable:

|             | 2.5% | 25% | 50% | 75% | 97.5% |
|-------------|------|-----|-----|-----|-------|
| edges       | -25  | -10 | -1  | 9   | 31    |
| degree1     | -13  | -4  | 0   | 4   | 12    |
| nodecov.rss | -90  | -32 | -1  | 33  | 93    |

**Are sample statistics significantly different from observed?**

|            | edges     | degree1    | nodecov.rss | Overall (Chi <sup>2</sup> ) |
|------------|-----------|------------|-------------|-----------------------------|
| diff.      | 0.0505000 | -0.1124000 | 0.07450000  | NA                          |
| test stat. | 0.0524262 | -0.2899927 | 0.02090356  | 0.2673271                   |
| P-val.     | 0.9581891 | 0.7718218  | 0.98332259  | 0.9660515                   |

Sample statistics cross-correlations:

|       | edges     | degree1    | nodecov.rss |
|-------|-----------|------------|-------------|
| edges | 1.0000000 | -0.8706452 | 0.7568610   |

```

degree1      -0.8706452  1.0000000  -0.5582727
nodecov.rss  0.7568610 -0.5582727  1.0000000

```

Sample statistics auto-correlation:  
Chain 1

```

          edges  degree1  nodecov.rss
Lag 0      1.0000000  1.0000000   1.0000000
Lag 100    0.9459533  0.8933994   0.9634909
Lag 200    0.8991287  0.8238714   0.9300327
Lag 300    0.8585887  0.7727913   0.8985329
Lag 400    0.8181824  0.7267730   0.8671116
Lag 500    0.7807026  0.6866192   0.8378673

```

Sample statistics burn-in diagnostic (Geweke):  
Chain 1

```

Fraction in 1st window = 0.1
Fraction in 2nd window = 0.5

```

```

          edges  degree1  nodecov.rss
-1.309          1.319    -1.213

```

P-values (lower = worse):

```

          edges  degree1  nodecov.rss
0.1905293    0.1870648  0.2249617

```

Sample statistics

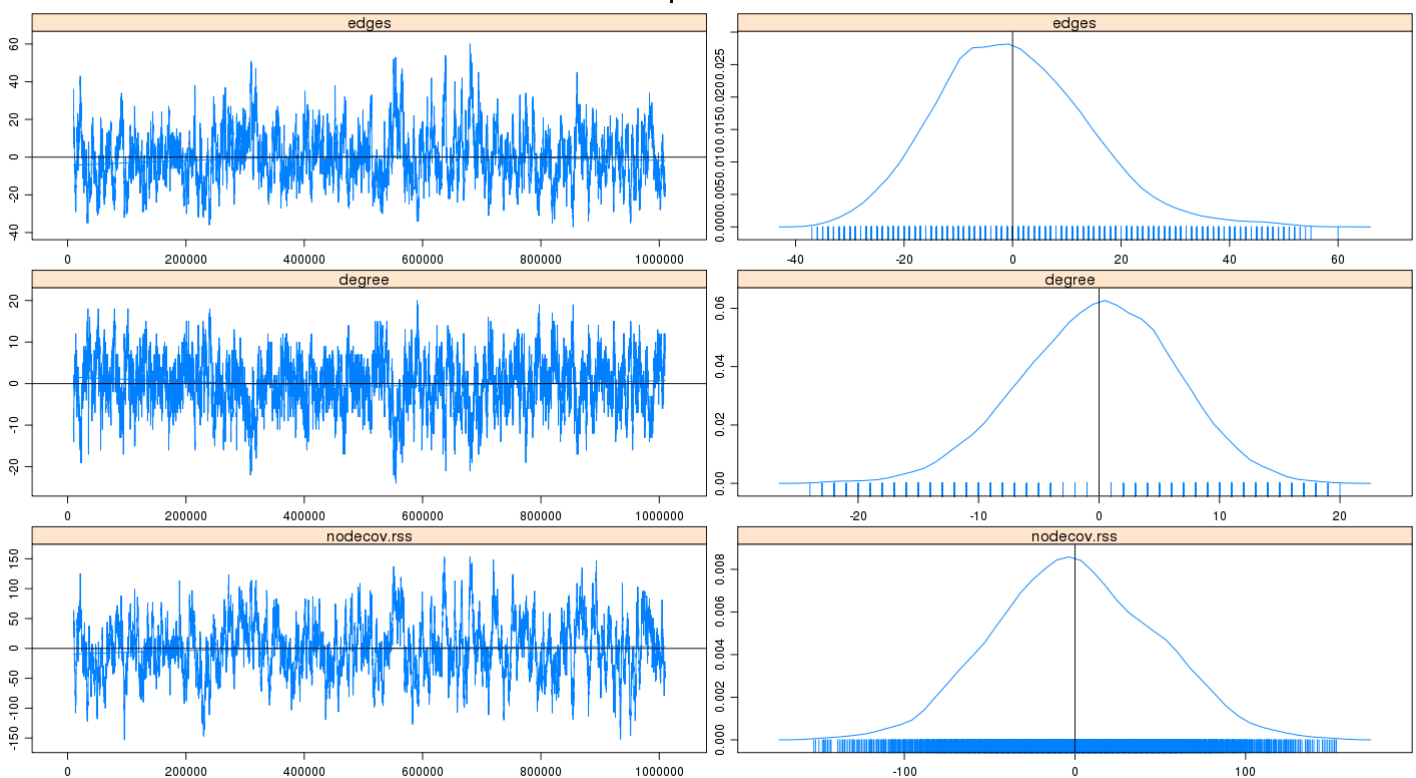

Supplementary Figure 3. Simulation details (left) and related statistics (right) of the stochastic analysis about the three components estimator (edges, degree, and nodecov.rss) for the graph describing the HOXB cluster of genes according to the Lieberman-Aiden et al. Hi-C experiment.

```
> model_iso <- ergm(n1 ~ edges+degree(1)+nodecov("iso"))
```

```
Iteration 1 of at most 20:  
Convergence test P-value: 0e+00  
The log-likelihood improved by 1.494  
Iteration 2 of at most 20:  
Convergence test P-value: 4.2e-97  
The log-likelihood improved by 0.2085  
Iteration 3 of at most 20:  
Convergence test P-value: 2.4e-16  
The log-likelihood improved by 0.04267  
Iteration 4 of at most 20:  
Convergence test P-value: 1.6e-04  
The log-likelihood improved by 0.01003  
Iteration 5 of at most 20:  
Convergence test P-value: 9.6e-04  
The log-likelihood improved by 0.007459  
Iteration 6 of at most 20:  
Convergence test P-value: 8e-02  
The log-likelihood improved by 0.004762  
Iteration 7 of at most 20:  
Convergence test P-value: 5.2e-01  
Convergence detected. Stopping.  
The log-likelihood improved by 0.002215
```

```
> summary(model_iso)
```

```
=====  
Summary of model fit  
=====
```

```
Formula: n1 ~ edges + degree(1) + nodecov("iso")
```

```
Iterations: 20
```

**Monte Carlo MLE Results:**

|             | Estimate  | Std. Error | MCMC % | p-value      |
|-------------|-----------|------------|--------|--------------|
| edges       | -3.307232 | 0.438861   | 83     | < 1e-04 ***  |
| degree1     | 2.474114  | 0.693693   | 79     | 0.000365 *** |
| nodecov.iso | -0.840357 | 0.092697   | 62     | < 1e-04 ***  |

```
---  
Signif. codes: 0 "****" 0.001 "***" 0.01 "**" 0.05 "." 0.1 " " 1
```

```
Null Deviance: 7714.7 on 5565 degrees of freedom  
Residual Deviance: 918.2 on 5562 degrees of freedom
```

```
AIC: 924.2 BIC: 944 (Smaller is better.)
```

```
> gof(model_iso)
```

```
Goodness-of-fit for degree
```

|   | obs | min | mean  | max | MC | p-value |
|---|-----|-----|-------|-----|----|---------|
| 0 | 0   | 0   | 1.75  | 6   |    | 0.34    |
| 1 | 67  | 54  | 68.76 | 83  |    | 0.82    |
| 2 | 12  | 1   | 8.54  | 15  |    | 0.30    |
| 3 | 17  | 2   | 9.00  | 18  |    | 0.04    |
| 4 | 2   | 2   | 6.96  | 16  |    | 0.04    |

|    |   |   |      |    |      |
|----|---|---|------|----|------|
| 5  | 1 | 0 | 4.54 | 12 | 0.16 |
| 6  | 2 | 0 | 2.51 | 7  | 1.00 |
| 7  | 1 | 0 | 1.15 | 5  | 1.00 |
| 8  | 0 | 0 | 0.65 | 3  | 0.98 |
| 9  | 0 | 0 | 0.51 | 3  | 1.00 |
| 10 | 0 | 0 | 0.32 | 2  | 1.00 |
| 11 | 0 | 0 | 0.15 | 2  | 1.00 |
| 12 | 0 | 0 | 0.07 | 1  | 1.00 |
| 13 | 1 | 0 | 0.05 | 2  | 0.08 |
| 14 | 1 | 0 | 0.02 | 1  | 0.04 |
| 15 | 1 | 0 | 0.02 | 1  | 0.04 |
| 20 | 0 | 0 | 0.01 | 1  | 1.00 |
| 22 | 0 | 0 | 0.01 | 1  | 1.00 |
| 24 | 1 | 0 | 0.01 | 1  | 0.02 |
| 25 | 0 | 0 | 0.02 | 1  | 1.00 |
| 26 | 0 | 0 | 0.05 | 1  | 1.00 |
| 27 | 0 | 0 | 0.08 | 1  | 1.00 |
| 28 | 0 | 0 | 0.03 | 1  | 1.00 |
| 29 | 0 | 0 | 0.10 | 1  | 1.00 |
| 30 | 0 | 0 | 0.06 | 1  | 1.00 |
| 31 | 0 | 0 | 0.06 | 1  | 1.00 |
| 32 | 0 | 0 | 0.08 | 1  | 1.00 |
| 33 | 0 | 0 | 0.05 | 1  | 1.00 |
| 34 | 0 | 0 | 0.12 | 1  | 1.00 |
| 35 | 0 | 0 | 0.10 | 1  | 1.00 |
| 36 | 0 | 0 | 0.05 | 1  | 1.00 |
| 37 | 0 | 0 | 0.03 | 1  | 1.00 |
| 38 | 0 | 0 | 0.04 | 1  | 1.00 |
| 39 | 0 | 0 | 0.03 | 1  | 1.00 |
| 40 | 0 | 0 | 0.03 | 1  | 1.00 |
| 41 | 0 | 0 | 0.01 | 1  | 1.00 |
| 42 | 0 | 0 | 0.01 | 1  | 1.00 |
| 43 | 0 | 0 | 0.01 | 1  | 1.00 |
| 49 | 0 | 0 | 0.01 | 1  | 1.00 |

Goodness-of-fit for edgewise shared partner

|      | obs | min | mean  | max | MC | p-value |
|------|-----|-----|-------|-----|----|---------|
| esp0 | 120 | 73  | 92.59 | 116 |    | 0.00    |
| esp1 | 0   | 6   | 18.19 | 35  |    | 0.00    |
| esp2 | 0   | 0   | 5.19  | 14  |    | 0.08    |
| esp3 | 0   | 0   | 1.36  | 8   |    | 0.68    |
| esp4 | 0   | 0   | 0.31  | 3   |    | 1.00    |
| esp5 | 0   | 0   | 0.08  | 2   |    | 1.00    |
| esp6 | 0   | 0   | 0.06  | 1   |    | 1.00    |

Goodness-of-fit for minimum geodesic distance

|     | obs  | min | mean    | max  | MC | p-value |
|-----|------|-----|---------|------|----|---------|
| 1   | 120  | 91  | 117.78  | 149  |    | 0.78    |
| 2   | 655  | 404 | 709.56  | 1267 |    | 0.80    |
| 3   | 809  | 608 | 1151.63 | 1740 |    | 0.12    |
| 4   | 1414 | 431 | 959.08  | 1411 |    | 0.00    |
| 5   | 837  | 166 | 463.41  | 997  |    | 0.04    |
| 6   | 741  | 9   | 149.05  | 417  |    | 0.00    |
| 7   | 380  | 0   | 34.75   | 207  |    | 0.00    |
| 8   | 74   | 0   | 5.29    | 57   |    | 0.00    |
| 9   | 30   | 0   | 0.49    | 9    |    | 0.00    |
| 10  | 0    | 0   | 0.04    | 3    |    | 1.00    |
| Inf | 505  | 808 | 1973.92 | 3714 |    | 0.00    |

```
> mcmc.diagnostics(model_iso)
Sample statistics summary:
```

```
Iterations = 10000:1009900
Thinning interval = 100
Number of chains = 1
Sample size per chain = 10000
```

1. Empirical mean and standard deviation for each variable,  
plus standard error of the mean:

|             | Mean    | SD     | Naive SE | Time-series SE |
|-------------|---------|--------|----------|----------------|
| edges       | -0.5141 | 13.547 | 0.13547  | 0.8256         |
| degree1     | 0.0550  | 6.715  | 0.06715  | 0.3728         |
| nodecov.iso | -8.2234 | 24.476 | 2.24476  | 9.5127         |

2. Quantiles for each variable:

|             | 2.5%   | 25% | 50% | 75% | 97.5% |
|-------------|--------|-----|-----|-----|-------|
| edges       | -24.00 | -10 | -2  | 8   | 28    |
| degree1     | -13.02 | -4  | 0   | 5   | 13    |
| nodecov.iso | -45.02 | -18 | -38 | 12  | 19    |

**Are sample statistics significantly different from observed?**

|            | edges      | degree1   | nodecov.iso | Overall (Chi <sup>2</sup> ) |
|------------|------------|-----------|-------------|-----------------------------|
| diff.      | -0.5141000 | 0.0550000 | -2.2234000  | NA                          |
| test stat. | -0.6227272 | 0.1475413 | -0.4464095  | 1.2645635                   |
| P-val.     | 0.5334638  | 0.8827047 | 0.1480624   | 0.5193436                   |

Sample statistics cross-correlations:

|             | edges      | degree1    | nodecov.iso |
|-------------|------------|------------|-------------|
| edges       | 1.0000000  | -0.8637495 | 0.5834390   |
| degree1     | -0.8637495 | 1.0000000  | -0.3559374  |
| nodecov.iso | 0.5834390  | -0.3559374 | 1.0000000   |

Sample statistics auto-correlation:

Chain 1

|         | edges     | degree1   | nodecov.iso |
|---------|-----------|-----------|-------------|
| Lag 0   | 1.0000000 | 1.0000000 | 1.0000000   |
| Lag 100 | 0.9418846 | 0.8945609 | 0.9724958   |
| Lag 200 | 0.8910281 | 0.8251952 | 0.9471588   |
| Lag 300 | 0.8448309 | 0.7672479 | 0.9230766   |
| Lag 400 | 0.8019794 | 0.7181222 | 0.9000278   |
| Lag 500 | 0.7615925 | 0.6739926 | 0.8768215   |

Sample statistics burn-in diagnostic (Geweke):

Chain 1

Fraction in 1st window = 0.1

Fraction in 2nd window = 0.5

|  | edges   | degree1 | nodecov.iso |
|--|---------|---------|-------------|
|  | 0.61736 | 0.06172 | 2.15205     |

P-values (lower = worse):

|  | edges      | degree1    | nodecov.iso |
|--|------------|------------|-------------|
|  | 0.53699653 | 0.95078271 | 0.31393487  |

### Sample statistics

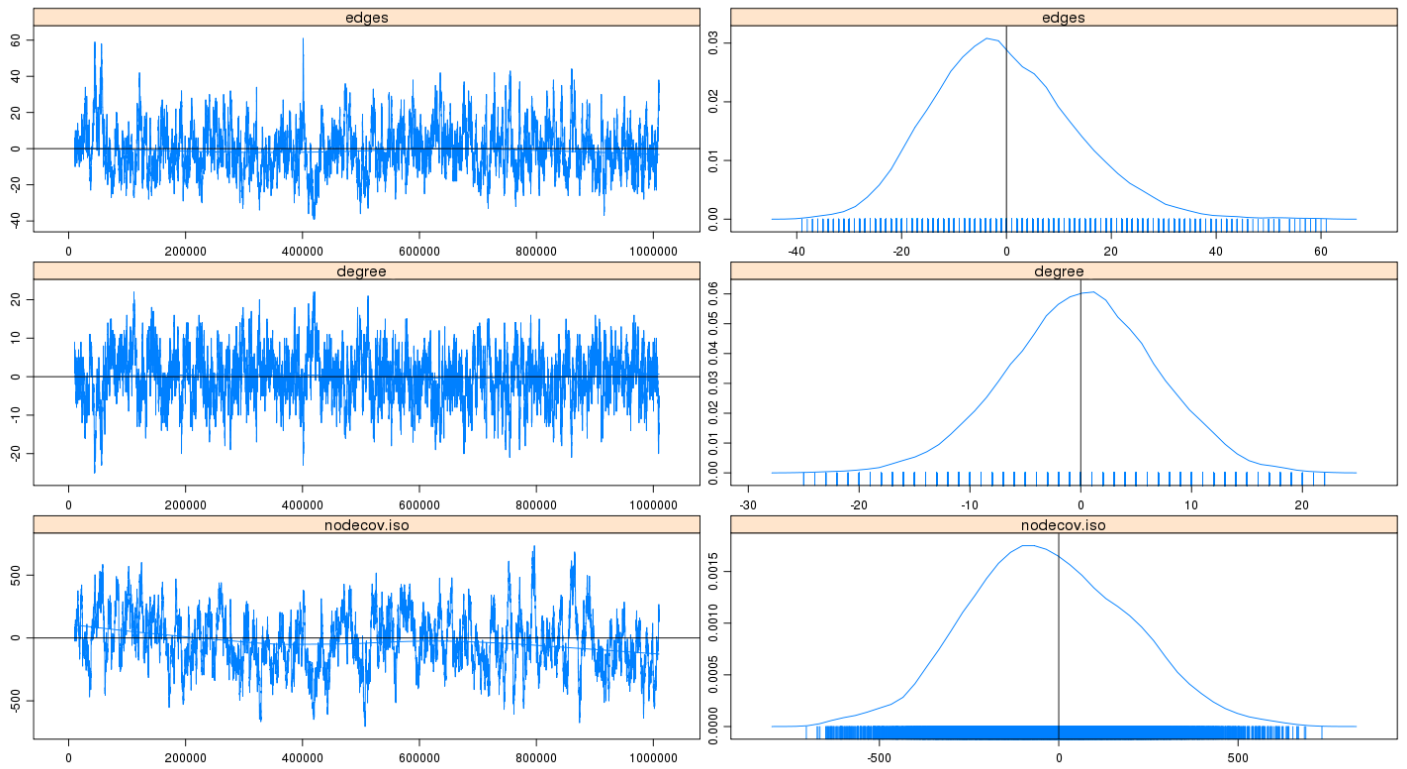

Supplementary Figure 4. Simulation details (left) and related statistics (right) of the stochastic analysis about the three components estimator (edges, degree, and nodecov.iso) for the graph describing the HOXB cluster of genes according to the Lieberman-Aiden et al. Hi-C experiment.



```
> model_dnase <- ergm(n1 ~ edges+degree(1)+nodecov("dnase"))
```

```
Iteration 1 of at most 20:  
Convergence test P-value: 0e+00  
The log-likelihood improved by 5.794  
Iteration 2 of at most 20:  
Convergence test P-value: 1.1e-60  
The log-likelihood improved by 1.245  
Iteration 3 of at most 20:  
Convergence test P-value: 6.6e-90  
The log-likelihood improved by 0.6984  
Iteration 4 of at most 20:  
Convergence test P-value: 3.5e-89  
The log-likelihood improved by 0.4642  
Iteration 5 of at most 20:  
Convergence test P-value: 7.7e-37  
The log-likelihood improved by 0.1958  
Iteration 6 of at most 20:  
Convergence test P-value: 1.3e-22  
The log-likelihood improved by 0.08744  
Iteration 7 of at most 20:  
Convergence test P-value: 1.3e-05  
The log-likelihood improved by 0.01626  
Iteration 8 of at most 20:  
Convergence test P-value: 3.9e-03  
The log-likelihood improved by 0.005713  
Iteration 9 of at most 20:  
Convergence test P-value: 2.4e-01  
The log-likelihood improved by 0.001532  
Iteration 10 of at most 20:  
Convergence test P-value: 5.1e-01  
Convergence detected. Stopping.  
The log-likelihood improved by 0.0009326
```

```
> summary(model_dnase)
```

```
=====  
Summary of model fit  
=====
```

```
Formula: n1 ~ edges + degree(1) + nodecov("dnase")
```

```
Iterations: 20
```

**Monte Carlo MLE Results:**

|               | Estimate | Std. Error | MCMC % | p-value    |
|---------------|----------|------------|--------|------------|
| edges         | -3.38574 | 0.22362    | 12     | <1e-04 *** |
| degree1       | 2.59670  | 0.35767    | 12     | <1e-04 *** |
| nodecov.dnase | 0.86291  | 0.07961    | 6      | <1e-04 *** |

```
---
```

```
Signif. codes: 0 "****" 0.001 "***" 0.01 "**" 0.05 "." 0.1 " " 1
```

```
Null Deviance: 7714.7 on 5565 degrees of freedom  
Residual Deviance: 974.6 on 5562 degrees of freedom
```

```
AIC: 980.6 BIC: 1000 (Smaller is better.)
```

```
> gof(model_dnase)
```

Goodness-of-fit for degree

|    | obs | min | mean  | max | MC | p-value |
|----|-----|-----|-------|-----|----|---------|
| 0  | 0   | 0   | 1.52  | 4   |    | 0.32    |
| 1  | 67  | 46  | 66.46 | 80  |    | 1.00    |
| 2  | 12  | 1   | 7.14  | 17  |    | 0.08    |
| 3  | 17  | 2   | 8.51  | 17  |    | 0.04    |
| 4  | 2   | 0   | 6.69  | 14  |    | 0.16    |
| 5  | 1   | 1   | 5.46  | 13  |    | 0.04    |
| 6  | 2   | 0   | 3.45  | 10  |    | 0.74    |
| 7  | 1   | 0   | 2.14  | 6   |    | 0.78    |
| 8  | 0   | 0   | 1.43  | 5   |    | 0.38    |
| 9  | 0   | 0   | 0.91  | 4   |    | 0.78    |
| 10 | 0   | 0   | 0.65  | 3   |    | 1.00    |
| 11 | 0   | 0   | 0.51  | 2   |    | 1.00    |
| 12 | 0   | 0   | 0.27  | 2   |    | 1.00    |
| 13 | 1   | 0   | 0.19  | 2   |    | 0.36    |
| 14 | 1   | 0   | 0.16  | 1   |    | 0.32    |
| 15 | 1   | 0   | 0.13  | 1   |    | 0.26    |
| 16 | 0   | 0   | 0.10  | 1   |    | 1.00    |
| 17 | 0   | 0   | 0.08  | 2   |    | 1.00    |
| 18 | 0   | 0   | 0.05  | 1   |    | 1.00    |
| 19 | 0   | 0   | 0.06  | 1   |    | 1.00    |
| 20 | 0   | 0   | 0.06  | 1   |    | 1.00    |
| 22 | 0   | 0   | 0.01  | 1   |    | 1.00    |
| 23 | 0   | 0   | 0.01  | 1   |    | 1.00    |
| 24 | 1   | 0   | 0.01  | 1   |    | 0.02    |

Goodness-of-fit for edgewise shared partner

|      | obs | min | mean   | max | MC | p-value |
|------|-----|-----|--------|-----|----|---------|
| esp0 | 120 | 84  | 101.00 | 125 |    | 0.12    |
| esp1 | 0   | 3   | 16.82  | 34  |    | 0.00    |
| esp2 | 0   | 0   | 3.64   | 15  |    | 0.26    |
| esp3 | 0   | 0   | 0.66   | 5   |    | 1.00    |
| esp4 | 0   | 0   | 0.13   | 2   |    | 1.00    |
| esp5 | 0   | 0   | 0.02   | 1   |    | 1.00    |

Goodness-of-fit for minimum geodesic distance

|     | obs  | min | mean    | max  | MC | p-value |
|-----|------|-----|---------|------|----|---------|
| 1   | 120  | 96  | 122.27  | 173  |    | 0.98    |
| 2   | 655  | 245 | 417.37  | 736  |    | 0.02    |
| 3   | 809  | 449 | 875.90  | 1541 |    | 0.84    |
| 4   | 1414 | 537 | 1036.78 | 1626 |    | 0.12    |
| 5   | 837  | 307 | 710.92  | 1043 |    | 0.44    |
| 6   | 741  | 55  | 304.11  | 704  |    | 0.00    |
| 7   | 380  | 0   | 94.74   | 510  |    | 0.04    |
| 8   | 74   | 0   | 26.29   | 225  |    | 0.20    |
| 9   | 30   | 0   | 7.49    | 133  |    | 0.20    |
| 10  | 0    | 0   | 2.09    | 82   |    | 1.00    |
| 11  | 0    | 0   | 0.35    | 22   |    | 1.00    |
| 12  | 0    | 0   | 0.06    | 6    |    | 1.00    |
| Inf | 505  | 513 | 1966.63 | 3582 |    | 0.00    |

```
> mcmc.diagnostics(model_dnase)
Sample statistics summary:
```

```
Iterations = 10000:1009900
Thinning interval = 100
```

Number of chains = 1  
 Sample size per chain = 10000

1. Empirical mean and standard deviation for each variable,  
 plus standard error of the mean:

|               | Mean    | SD    | Naive SE | Time-series SE |
|---------------|---------|-------|----------|----------------|
| edges         | 1.0849  | 13.23 | 0.1323   | 0.7842         |
| degree1       | -0.4358 | 5.92  | 0.0592   | 0.3313         |
| nodecov.dnase | 1.0124  | 21.30 | 0.2130   | 1.4731         |

2. Quantiles for each variable:

|               | 2.5% | 25% | 50% | 75% | 97.5% |
|---------------|------|-----|-----|-----|-------|
| edges         | -23  | -8  | 1   | 9   | 29    |
| degree1       | -13  | -4  | 0   | 4   | 10    |
| nodecov.dnase | -43  | -13 | 1   | 16  | 42    |

**Are sample statistics significantly different from observed?**

|            | edges     | degree1    | nodecov.dnase | Overall (Chi <sup>2</sup> ) |
|------------|-----------|------------|---------------|-----------------------------|
| diff.      | 1.0849000 | -0.4358000 | 1.0124000     | NA                          |
| test stat. | 1.3833705 | -1.3154983 | 0.6872654     | 1.3255196                   |
| P-val.     | 0.1665513 | 0.1883425  | 0.4919155     | 0.5076497                   |

Sample statistics cross-correlations:

|               | edges      | degree1    | nodecov.dnase |
|---------------|------------|------------|---------------|
| edges         | 1.0000000  | -0.8322978 | 0.7842621     |
| degree1       | -0.8322978 | 1.0000000  | -0.5092799    |
| nodecov.dnase | 0.7842621  | -0.5092799 | 1.0000000     |

Sample statistics auto-correlation:

Chain 1

|         | edges     | degree1   | nodecov.dnase |
|---------|-----------|-----------|---------------|
| Lag 0   | 1.0000000 | 1.0000000 | 1.0000000     |
| Lag 100 | 0.9391258 | 0.8775555 | 0.9543859     |
| Lag 200 | 0.8877318 | 0.7973573 | 0.9135582     |
| Lag 300 | 0.8400531 | 0.7350269 | 0.8765605     |
| Lag 400 | 0.7958272 | 0.6856351 | 0.8415857     |
| Lag 500 | 0.7545763 | 0.6428520 | 0.8070126     |

Sample statistics burn-in diagnostic (Geweke):

Chain 1

Fraction in 1st window = 0.1

Fraction in 2nd window = 0.5

| edges  | degree1 | nodecov.dnase |
|--------|---------|---------------|
| 0.7512 | -0.7546 | 0.4739        |

P-values (lower = worse):

| edges     | degree1   | nodecov.dnase |
|-----------|-----------|---------------|
| 0.4525065 | 0.4504791 | 0.6355580     |

### Sample statistics

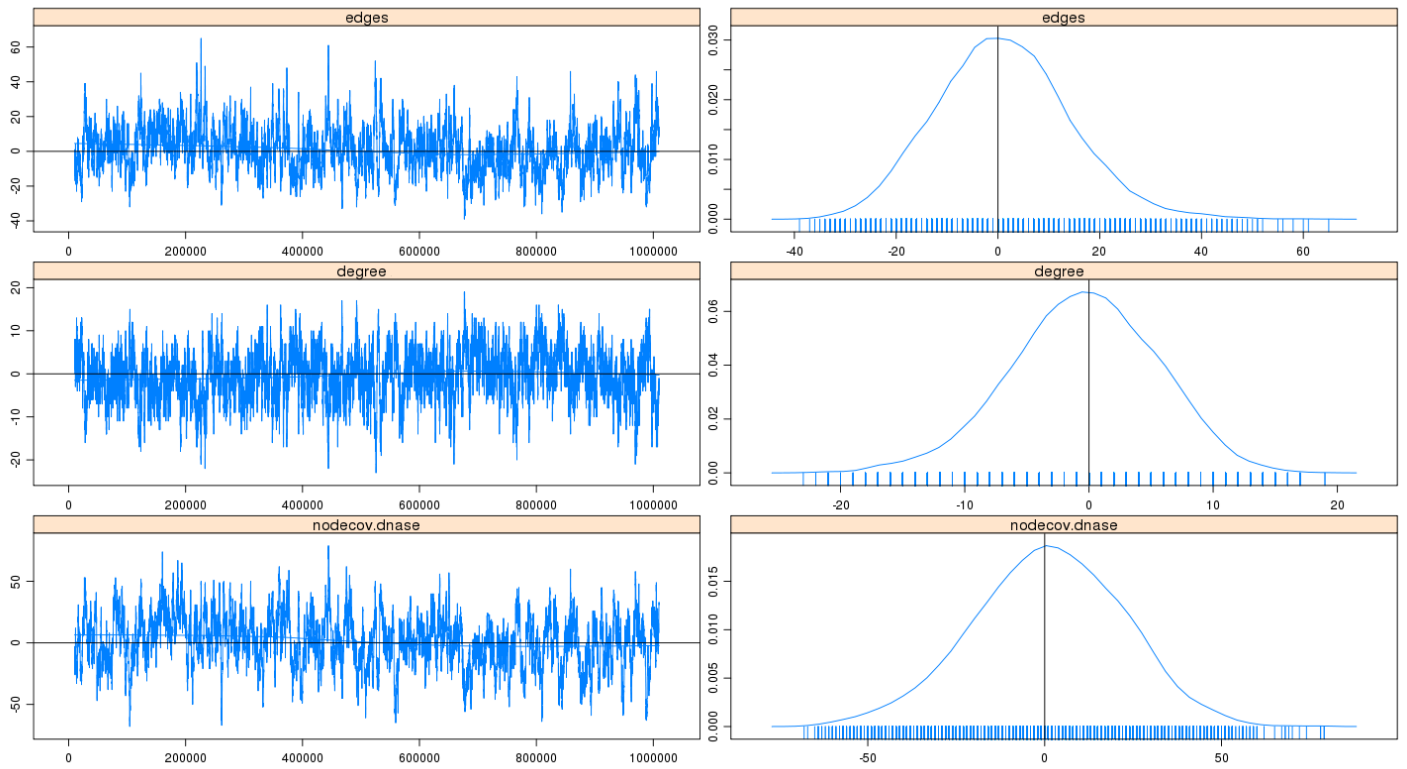

Supplementary Figure 5. Simulation details (left) and related statistics (right) of the stochastic analysis about the three components estimator (edges, degree, and nodecov.dnase) for the graph describing the HOXB cluster of genes according to the Lieberman-Aiden et al. Hi-C experiment.
